# Supplementary material for: Phase 2 trial of T-cell activation using MVI-816 and pembrolizumab in patients with metastatic, castration-resistant prostate cancer (mCRPC)
Source: PubMed Central journal article supplement — J Immunother Cancer. 2022 Mar 11;10(3):e004198. doi: 10.1136/jitc-2021-004198 (PMC8919462; doi:10.1136/jitc-2021-004198), 2022-03-11
Supplement: jitc-2021-004198supp001.pdf [file jitc-2021-004198supp001.pdf]

|                                           | Grade<br>1 | Grade<br>2 | Grade<br>3 | Grade<br>4 | Grade<br>5 |
|-------------------------------------------|------------|------------|------------|------------|------------|
| Endocrine                                 |            |            |            |            |            |
| Adrenal insufficiency                     |            |            | 2          |            |            |
| Hyperthyroidism / decreased TSH           | 7          | 7          | 1          |            |            |
| Hypothyroidism / increased TSH            | 1          | 13         |            |            |            |
| Gastrointestinal                          |            |            |            |            |            |
| Abdominal pain                            | 1          | 1          | 1          |            |            |
| Colitis                                   |            | 1          | 3          |            |            |
| Diarrhea                                  | 9          | 2          | 4          |            |            |
| Hepatitis                                 |            |            | 1          |            |            |
| Nausea                                    | 7          | 3          |            |            |            |
| Pancreatitis                              |            |            | 1          |            |            |
| Vomiting                                  | 3          |            | 1          |            |            |
| General                                   |            |            |            |            |            |
| Chills                                    | 11         |            |            |            |            |
| Injection site reaction                   | 19         |            |            |            |            |
| Infusion related reaction                 |            | 3          |            |            |            |
| Multi-organ failure                       |            |            |            |            | 1          |
| Weight gain                               | 1          | 1          |            |            |            |
| Lab investigations                        |            |            |            |            |            |
| Increased AST                             | 3          | 1          | 2          |            |            |
| Increased amylase                         | 1          | 1          | 1          |            |            |
| Metabolism and Nutrition                  |            |            |            |            |            |
| Anorexia                                  | 5          |            |            |            |            |
| Hyperglycemia                             | 1          | 1          |            | 1          |            |
| Musculoskeletal and Connective Tissue     |            |            |            |            |            |
| Arthralgias / arthritis                   | 6          | 1          |            |            |            |
| Back pain                                 | 1          | 2          | 1          |            |            |
| Bone pain                                 | 2          |            | 1          |            |            |
| Muscle weakness                           | 1          | 1          | 1          |            |            |
| Myalgia                                   | 5          | 2          |            |            |            |
| Nervous System                            |            |            |            |            |            |
| Dizziness                                 | 4          | 1          |            |            |            |
| Headache                                  | 6          |            |            |            |            |
| Syncope                                   |            |            | 1          |            |            |
| Respiratory, Thoracic                     |            |            |            |            |            |
| Cough                                     | 6          |            |            |            |            |
| Hypoxia                                   |            |            | 1          |            |            |
| Skin and Subcutaneous                     |            |            |            |            |            |
| Pruritus                                  | 3          |            | 1          |            |            |
| Rash maculo-papular                       | 4          | 1          | 1          |            |            |
| Vascular                                  |            |            |            |            |            |
| Thromboembolic event (pulmonary embolism) |            |            | 1          |            |            |

**Supplemental Table 1: Adverse Events for All Study Patients.** All adverse events with a frequency >5%, and any adverse events with grade > grade 2, that were believed to be at least possibly related to treatment, are shown for all trial arms. The numbers represent the number of patients experiencing a particular event at any point during the treatment period, with the highest grade reported for any single individual.

| Subject ID    | MSI <sup>hi</sup> or HRR mutation | Best PSA change from baseline (%) | rPFS (months) | Time on trial (months) |
|---------------|-----------------------------------|-----------------------------------|---------------|------------------------|
| 30005 (Arm 3) | MSI <sup>hi</sup> and MSH3        | -90.1                             | 11.0          | 11.3                   |
| 40011 (Arm 4) | MSI <sup>hi</sup>                 | 38.2                              | 5.3           | 8.2                    |
| 20002 (Arm 2) | ATM                               | (not evaluable)                   | 5.5           | 5.5                    |
| 20012 (Arm 2) | ATM                               | 22.5                              | 0             | 2.5                    |
| 30007 (Arm 3) | BRCA1                             | 5.5                               | 5.4           | 5.9                    |
| 30008 (Arm 3) | FANCA, MLH3                       | 32.4                              | 2.5           | 3.4                    |
| 30014 (Arm 3) | BRCA1                             | -38.0                             | 2.6           | 3.0                    |
| 30017 (Arm 3) | MSH2, MLH1                        | 52.5                              | 2.6           | 3.7                    |
| 30018 (Arm 3) | MSH6                              | 65.2                              | 2.8           | 4.0                    |
| 40009 (Arm 4) | BRCA2                             | 24.2                              | 1.4           | 1.4                    |
| 40014 (Arm 4) | BRCA1                             | 41.7                              | 2.5           | 2.8                    |

**Supplemental Table 2: HRR mutations and patient outcomes.** Pre-treatment plasma was available for 61/66 patients and evaluated for HRR mutations or MSI<sup>hi</sup> tumor status by cfDNA testing (Tempus). Shown are the specific mutations and outcomes (best % PSA change from baseline, rPFS, and time on trial) for patients with identified mutations.

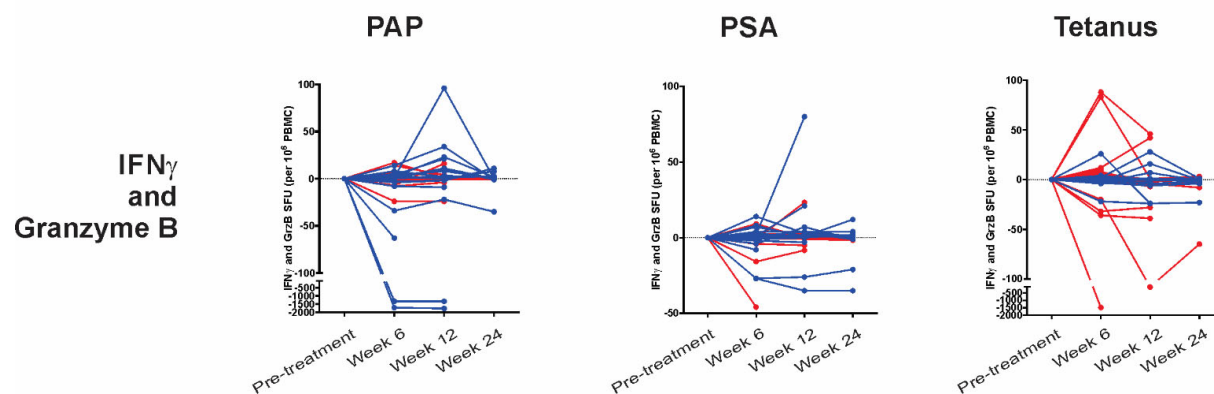

**Supplemental Figure 1:** Immunological response - IFN $\gamma$  and Granzyme B fluorescent ELISPOT.

Peripheral blood mononuclear cells were collected from subjects at baseline, 6 weeks, 12 weeks, and 24 weeks and evaluated for antigen-specific secretion of both IFN $\gamma$  and granzyme B by fluorescent ELISPOT. Shown are the spot-forming units (SFU) following stimulation with a PAP peptide library, PSA peptide library (non-specific control), or tetanus (positive control) for each patient. Patients treated in Arm 3 are colored red, and patients treated in Arm 4 are colored blue.

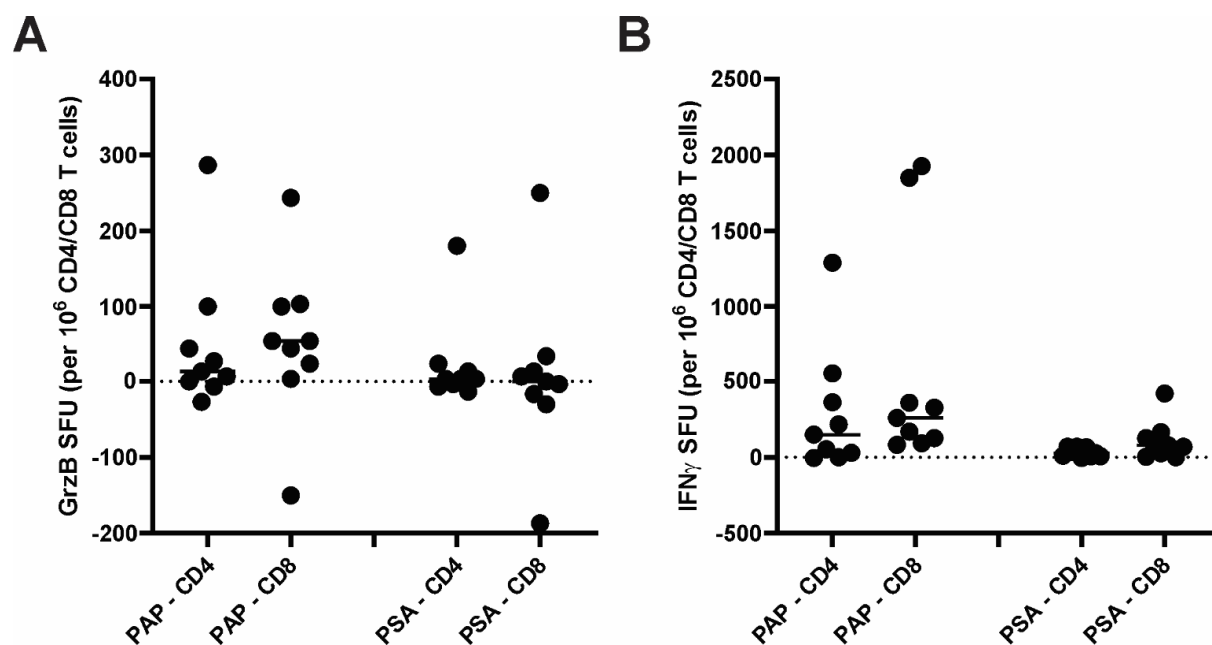

**Supplemental Figure 2:** Immunological response - IFN<sub>γ</sub> and Granzyme B fluorescent ELISPOT.

Cryopreserved peripheral blood mononuclear cells collected from 9 subjects after 24 weeks of treatment were separated into CD4, CD8 and CD14 cells by magnetic selection. CD4 or CD8 T cells were cultured with CD14 cells at a 10:1 ratio in the presence of PAP or PSA peptide libraries for 48 hours, and evaluated for granzyme B (panel A) or IFN<sub>γ</sub> (panel B) secretion by ELISPOT. Shown are the spot-forming units (SFU) for each condition, with background (media only, no peptide library) subtracted from each.

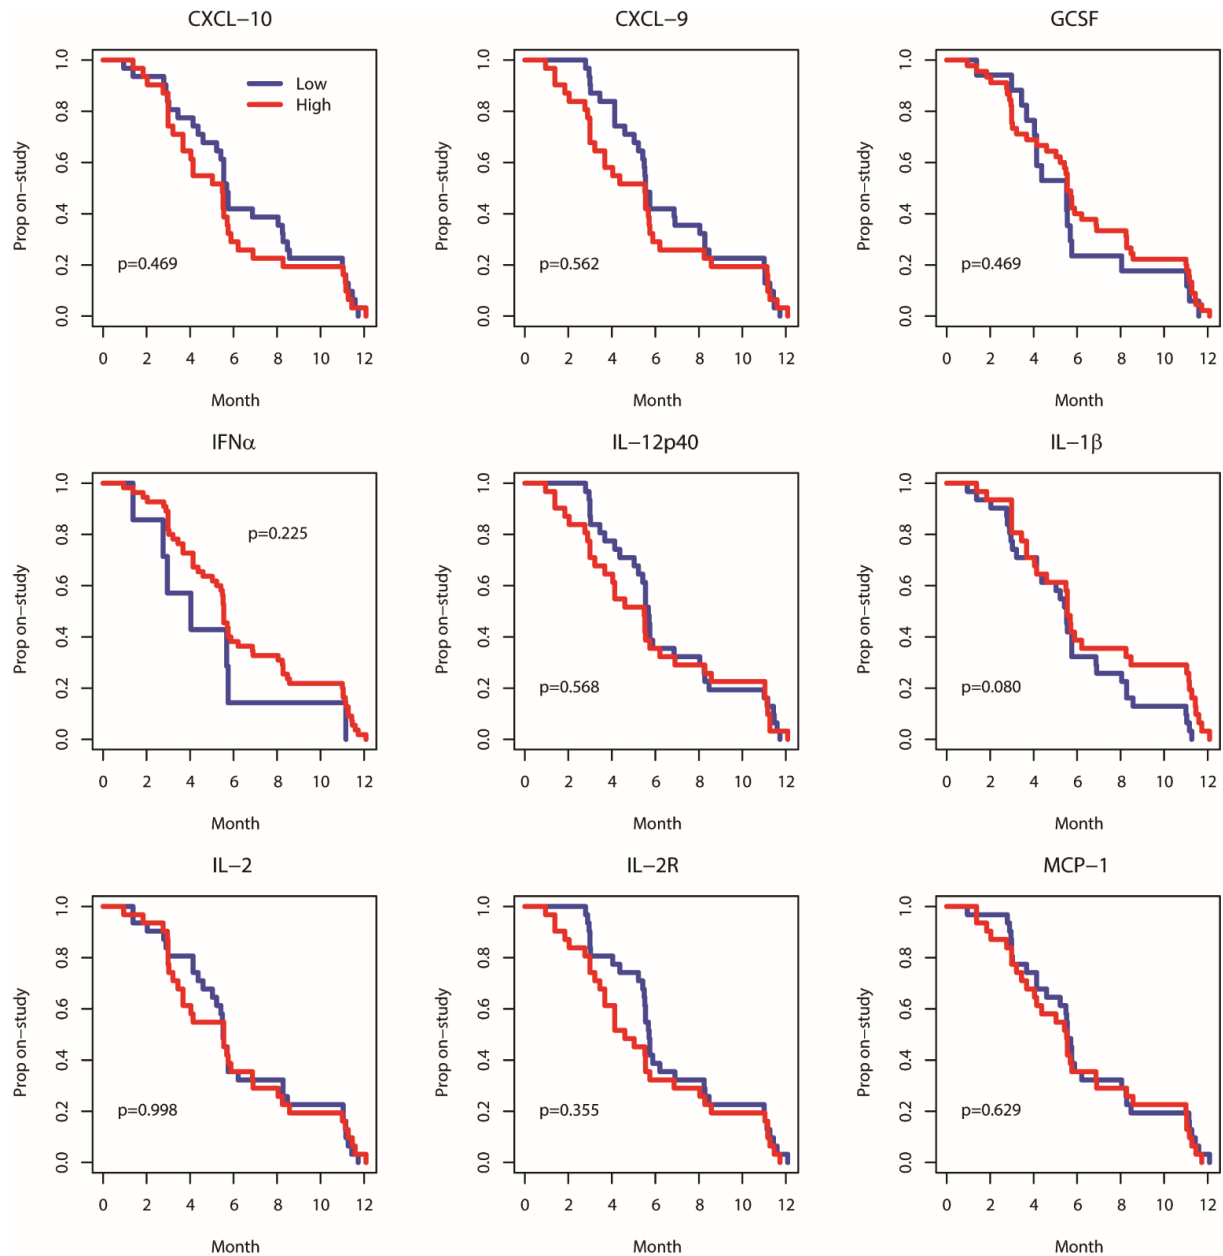

**Supplemental Figure 3:** Association of changes in cytokines with time on trial. Time on trial was assessed with respect to changes in CXCL-10, CXCL-9, G-CSF, IFN $\alpha$ , IL-12p40, IL-1 $\beta$ , IL-2, IL-2R, and MCP-1. For each panel, time on trial is plotted with respect to changes greater (red) or less than (blue) the median for each patient. No statistically significant differences were observed (log-rank test).

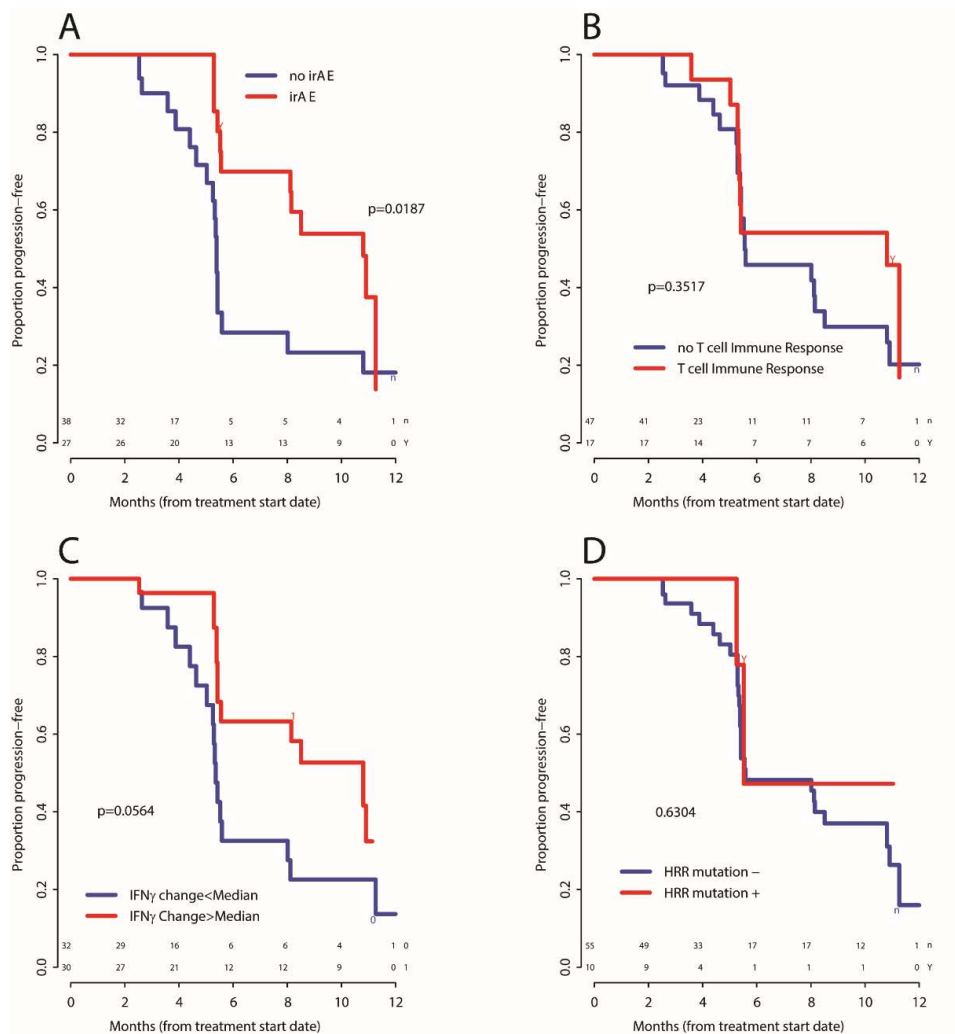

**Supplemental Figure 4: Radiographic progression-free survival correlative analyses.** Radiographic progression-free survival was assessed with respect to the development of grade 2 or higher immune-related adverse events (panel A), T-cell immune response to PAP (panel B), increases in serum IFN $\gamma$  (panel C), and the presence of baseline HRR mutations (panel D). Statistical comparisons are made using a log-rank test, with  $p < 0.05$  considered statistically significant.
